1 **Title:** HIV-specific CD8 T cells from elite controllers have an epigenetic imprint that preserves  
2 effector functions

3

4 Adolfo B. Frias<sup>1\*</sup>, Rachel L. Rutishauser<sup>2\*</sup>, Ashish A. Sharma<sup>3\*</sup>, Tian Mi<sup>1</sup>, Hossam  
5 Abdelsamed<sup>4</sup>, Caitlin Zebley<sup>1</sup>, Christian M. Constantz<sup>2</sup>, Mars Stone<sup>5</sup>, Michael P. Busch<sup>5</sup>, Steven  
6 G. Deeks<sup>2</sup>, Rafick-Pierre Sékaly<sup>3†</sup>, and Ben Youngblood<sup>1†</sup>

7

8 <sup>1</sup>Department of Immunology, St. Jude Children's Research Hospital, Memphis, Tennessee

9 <sup>2</sup>Department of Medicine, UCSF, San Francisco, California

10 <sup>3</sup>Department of Pathology, Emory University, Atlanta, Georgia

11 <sup>4</sup>Department of Surgery, University of Pittsburgh, Pittsburgh, Pennsylvania

12 <sup>5</sup>Vitalant Research Institute, San Francisco, California

13 \* equal contribution, names listed alphabetically

14

15 †Corresponding authors:

16 Dr. Rafick-Pierre Sékaly, Department of Pathology, Emory University, Atlanta, Georgia 30322.

17 E-mail address: rafick.sekaly@emory.edu

18 Dr. Benjamin Youngblood, Department of Immunology, MS 351, St. Jude Children's Research  
19 Hospital, 262 Danny Thomas Place, Memphis, Tennessee 38105.

20 E-mail address: benjamin.youngblood@stjude.org

21

22 **Running title:** Epigenetic poised state allows EC HIV-specific CD8 T cell responsiveness

23

24 **Keywords:** CD8 T cells, Human Immunodeficiency Virus, elite control, DNA methylation,  
25 transcriptional signature, T cell activation, T cell exhaustion, cytokine signaling

26

27 **Abstract:**

28 Several lines of evidence support a central role for CD8 T cells as key determinants in the  
29 control of HIV, particularly in rare “elite controllers” who control the virus to undetectable levels  
30 in the blood in the absence of antiretroviral therapy (ART). While HIV-specific CD8 T cells  
31 isolated from elite controllers have enhanced antiviral cytokine production and proliferative  
32 capacity in response to antigen stimulation when compared to cells isolated from viremic or  
33 even aviremic ART-suppressed non-controllers, the cell-intrinsic mechanisms underlying the  
34 enhanced T cell memory-like function of HIV-specific CD8 T cells in elite controllers remain  
35 largely undefined. To identify the transcriptional and epigenetic pathways that regulate  
36 functional capacity in HIV-specific CD8 T cells in elite controllers, we performed genome-wide  
37 transcriptional and DNA methylation analysis of MHC Class I multimer+ CD8 T cells sorted from  
38 aviremic elite controllers compared to aviremic non-controllers on suppressive ART. Co-omics  
39 analysis revealed enrichment for gene signatures that support a multipotent differentiation state,  
40 cell survival, and a long-lived effector cell fate in HIV-specific CD8 T cells from elite controllers.  
41 Specifically, we observed DNA methylation programs at the transcription factor binding sites of  
42 the stem-associated factors TCF-1 and LEF1 that delineate HIV-specific CD8 T cells from elite  
43 controllers versus ART-treated individuals. HIV-specific CD8 T cells in elite controllers also  
44 maintain T cell receptor and IL-12/STAT4 pathway signaling and have suppressed pro-apoptotic  
45 TNF $\alpha$  pathway signaling. These findings show that HIV-specific CD8 T cells from elite  
46 controllers have enhanced expression and DNA methylation programs that maintain  
47 developmental potential and in turn promote long-term survival, proliferative potential, and  
48 effector capacity. These data also provide new insights into the relationship between stem-  
49 associated transcription factors and stable epigenetic restriction of T cell developmental  
50 capacity.

51

52

## 53 Introduction

54 The majority of people with Human Immunodeficiency Virus (HIV) infection initially  
55 generate a robust immune response but ultimately fail to control of the virus, resulting in  
56 persistent infection and the subsequent development of acquired immunodeficiency syndrome  
57 (AIDS). A rare group of individuals (<1% of people with HIV), known as elite controllers (ECs),  
58 control the virus to undetectable levels in the blood and do not progress to AIDS. Several lines  
59 of evidence, including genome-wide association studies in humans and experimental studies in  
60 macaques with Simian Immunodeficiency Virus (SIV) support the notion that CD8 T cells play  
61 an essential role in mediating viral control in elite controllers (1-3).

62 HIV-specific CD8 T cells isolated from ECs produce more cytokines and proliferate more  
63 robustly in response to T cell receptor (TCR) stimulation than their counterparts in untreated  
64 non-controllers with high viral loads (4-7). Interestingly, HIV-specific CD8 T cell functional  
65 capacity in non-controllers is not completely restored by suppressive antiretroviral therapy  
66 (ART) (8,9), suggesting that persistent exhaustion and impaired responsiveness to antigen  
67 stimulation may be epigenetically regulated in these cells, as has been seen in other settings  
68 (e.g., after virologic cure in chronic hepatitis C infection, (10-13). Based on murine models of  
69 infection with lymphocytic choriomeningitis virus (LCMV), compared to functional effector and  
70 memory cells generated in the context of an acute infection, exhausted virus-specific CD8 T  
71 cells occupy a unique transcriptional, epigenetic, and metabolic state imprinted early during  
72 chronic infection (14-16). In particular, in both mice and humans, the transcription factor (TF)  
73 Tox (17), *de novo* DNA methylation by the methyltransferase DNMT3a (18) (Prinzing et al., *Sci*  
74 *Transl Med*, accepted), and the preferential use of glycolytic bioenergetic pathways (16) have  
75 been shown to promote CD8 T cell exhaustion in humans. In HIV infection, exhausted HIV-  
76 specific CD8 T cells isolated from viremic non-controllers express higher levels of co-inhibitory  
77 receptors that inhibit TCR signaling (e.g., PD-1 (19)) and lower levels of the T cell stemness and  
78 memory-associated TF TCF-1 (encoded by the gene, *TCF7*) compared to the more functional

79 HIV-specific CD8 T cells in ECs (9,20). While chromatin accessibility differences persist in non-  
80 controllers after HIV viral load is suppressed with ART (10), the transcriptional and underlying  
81 epigenetic mechanisms that regulate persistent exhaustion in this setting have not been  
82 elucidated, nor is it clear what mechanisms promote enhanced functional capacity in HIV-  
83 specific CD8 T cells in ECs. Because many HIV cure strategies such as therapeutic vaccination  
84 and adoptive T cell therapies seek to promote the formation of EC-like functional HIV-specific  
85 CD8 T cells in ART-suppressed individuals, it is critical to understand how exhaustion and virus-  
86 specific CD8 T cell functional capacity is regulated in these two clinical groups.

87         In this study, we compared the transcriptional and epigenetic profiles of MHC Class I  
88 multimer+ HIV-specific CD8 T cells from aviremic ECs versus aviremic ART-suppressed non-  
89 controllers to understand why HIV-specific CD8 T cells from ECs maintain long-term enhanced  
90 responsiveness to TCR simulation. Using whole-genome RNA-sequencing and DNA  
91 methylation profiling, we found that genes associated with distinct T cell differentiation states  
92 (e.g., effector, memory/stem-like, exhausted) were differentially expressed and had regions of  
93 differential DNA methylation in HIV-specific CD8 T cells from ECs compared to non-controllers  
94 on suppressive ART. The retained memory/stem-like functional capacity of EC virus-specific T  
95 cells was coupled to distinct DNA methylation programs at TCF-1 and LEF1 transcription factor  
96 binding sites. Furthermore, functional HIV-specific CD8 T cells from ECs have transcriptomic  
97 and DNA methylation signatures suggestive of a more active metabolic state and heightened  
98 responsiveness to TCR, IL-12/STAT4, IL-2/STAT5 and GPCR signaling. This study provides  
99 insight into transcriptional and epigenetic mechanisms that govern sustained proliferative  
100 capacity, survival, and antiviral function of HIV-specific CD8 T cells in elite controllers and  
101 identifies candidate target pathways for optimizing T cell-based HIV cure therapies.

102

103 **Results**

104 **HIV-specific CD8 T cells from ECs versus ART-suppressed non-controllers are**  
105 **transcriptionally and epigenetically distinct**

106 During HIV infection, CD8 T cells from aviremic ECs have enhanced proliferative  
107 capacity and cytokine production compared to cells from aviremic non-controllers on  
108 suppressive ART (8,9). To understand the cell intrinsic mechanisms regulating exhaustion in  
109 HIV-specific CD8 T cells from non-controllers on ART compared to ECs, we took a co-omics  
110 approach to probe gene expression and epigenetic differences. We FACS-sorted HIV-specific  
111 MHC Class I multimer+ CD8 T cells from ECs and non-controllers on suppressive ART enrolled  
112 in the San Francisco-based SCOPE cohort and performed bulk RNA sequencing and whole  
113 genome DNA bisulfite sequencing. To understand the relationship between the transcriptional  
114 signature of HIV-specific multimer+ CD8 T cells and bulk CD8 T cell subsets, we performed a  
115 principal component analysis (PCA). Bulk CD8 T cells sorted from the same EC and ART  
116 donors using markers that denote classically-defined subsets (naïve [TN:  
117 CD45RA+CCR7+CD27+], central memory [TCM: CD45RA+CCR7+CD27+], and effector  
118 memory [TEM: CD45RA+CCR7+CD27-]) grouped according to developmental state. As  
119 expected, based on their phenotype (9), HIV-specific multimer+ CD8 T cells from both the EC  
120 and ART group clustered closely to TEM CD8 T cells. (Fig. 1a). There were 1002 differentially  
121 expressed genes (DEGs) between the EC and ART HIV-specific CD8 T cells ( $p < 0.05$ ; Fig. 1b).  
122 Notably, genes more highly expressed in HIV-specific CD8 T cells from ECs suggest enhanced  
123 responsiveness to cytokine signaling (e.g., higher expression of *IL2RA*, the gene encoding  
124 CD25), faster antiviral responses upon TCR engagement (e.g., higher expression of *IFNG*  
125 transcript), and enhanced homing to B cell follicles (e.g., higher expression of *CXCR5*; Fig. 1c,  
126 top). In contrast to the memory-associated programming observed in the EC HIV-specific CD8 T  
127 cells, genes more highly expressed in HIV-specific CD8 T cells from ART-suppressed  
128 individuals suggest a cell type that is more terminally differentiated, both phenotypically (with  
129 higher levels of expression of NK cell receptors that tend to mark terminal effector cells, e.g.,

130 *KLRC4*) and functionally (with expression of cytotoxic molecules, e.g., *GNL Y*) (Fig. 1c, bottom).  
131 From the transcriptional data we conclude that, although EC and ART HIV-specific CD8 T cells  
132 both cluster with the bulk TEM subset, HIV specific CD8 T cells from ECs differentially express  
133 transcripts that suggest enhanced T cell survival and homing, and a less differentiated T cell  
134 state.

135 We next performed a PCA analysis on the samples in the DNA methylation dataset.  
136 Once again, bulk CD8 T cell populations (TN, TCM, TEM, and stem-cell memory [TSCM:  
137 CD45RA+CCR7+CD95+] CD8 T cells isolated from HIV-uninfected donors) clustered by  
138 developmental state. While the HIV-specific CD8 T cells from ECs grouped near bulk CD8 TEM  
139 cells as in the transcriptome dataset, the ART HIV-specific CD8 T cells clustered separately  
140 (Fig. 1d). In order to identify the DNA methylation programs that delineate HIV-specific  
141 multimer+ CD8 T cells from ECs compared to ART-suppressed individuals, we performed a  
142 pairwise comparison of gene-associated differentially methylated regions (DMRs), defined as  
143 significantly differential methylation ( $p < 0.01$ ) at  $\geq 3$  CpG sites within a minimum base pair  
144 length of 100, and we associated each DMR to a single gene (Fig. 1d). Applying a threshold of  
145 20% methylation difference, we found 3690 DMRs between EC versus ART HIV-specific  
146 multimer+ CD8 T cells with the majority of regions (64.9%) more methylated in ECs, and largely  
147 located within intron or intergenic regions. Of the DMRs, we found that HIV-specific CD8 T cells  
148 from ECs maintained methylation of the first intronic region within the *PDCD1* locus (encodes  
149 PD-1), with a methylation pattern at this site similar to more multipotent bulk CD8 T cell subsets  
150 (e.g., TN, TSCM; Fig. 1f). Taken together, these data show that HIV-specific CD8 T cells from  
151 ECs versus ART-suppressed individuals can be distinguished by their DNA methylation profile.  
152 Notably, we found methylation differences in the gene locus encoding the inhibitory receptor  
153 PD-1, which suggests one potential mechanism for sustained enhanced TCR responsiveness in  
154 HIV-specific CD8 T cells in ECs.

155

156 **HIV-specific CD8 T cells from ECs have transcriptional and epigenetic features of long-**  
157 **lived memory cells**

158 To better define the gene expression and/or methylation signatures associated with HIV-  
159 specific CD8 T cells isolated from either ECs or ART-suppressed previous non-controllers, we  
160 performed gene set enrichment analysis on our transcriptome and methylome datasets using  
161 publicly-available gene lists generated from bulk CD8 T cells in different differentiation states  
162 (e.g., TN, TSCM, TCM, TEM and the recently defined long-lived effector cells [LLECs:  
163 CD45RO+KLRG1+CD127<sup>Int</sup>CD27<sup>low</sup>] (21)), as well as functionally-distinct sub-populations of  
164 antigen-specific CD8 T cells in chronic viral infection (e.g., terminally exhausted cells [Tex],  
165 progenitor [Prog1, Prog2] and intermediately differentiated sub-populations (22)) (Figure 2a,  
166 top). Compared to ECs, multimer+ HIV-specific CD8 T cells from ART-treated individuals had  
167 both increased expression and lower DNA methylation of genes that define TEM cells  
168 (compared to the less-differentiated TCM and TSCM subsets), and they also had higher  
169 expression and lower DNA methylation of genes associated with more terminally exhausted  
170 virus-specific CD8 T cells compared to the progenitor or intermediate sub-populations that form  
171 in chronic infection in mice. Leading edge genes from these comparisons whose expression  
172 was enriched in the ART CD8 T cells included targets involved in CD8 T cell dysfunction  
173 (*TNFRSF1B*) (23), terminal effector function (*GZMB*, *GZMM*) (24), and terminal effector  
174 differentiation (*IKZF2*, *ZEB2*) (25,26) (Fig. 2b). In contrast, leading edge genes in EC HIV  
175 specific CD8 T cells included markers for lymph node trafficking (*SELL*), positive modulation of  
176 T cell effector metabolism (*MYC*) (27), and follicular trafficking and CD8 T cell mediated viral  
177 control (*CXCR5*) (28) (Fig 2a, top). Similarly, genes associated with DMRs that were less  
178 methylated in the ART samples include the lymph node and bone marrow egress marker  
179 *S1PR5* and the T cell effector differentiation marker *CX3CR1* (29) (Fig. 2c). Interestingly,  
180 compared to ECs, HIV-specific CD8 T cells from ART-suppressed individuals also had higher  
181 expression of genes that are more highly expressed in TCMs compared to LLECs, a recently-

182 described population of cells that are long-lived but simultaneously maintain immediate effector  
183 functions (21). Taken together, our data suggest that HIV-specific CD8 T cells from ECs appear  
184 to occupy a less exhausted hybrid differentiation state in which they retain some features of  
185 more multipotent memory cells as well as some features of long-lived effector cells.

186

## 187 **Distinct regulation of T cell differentiation transcriptional and epigenetic pathways in** 188 **HIV-specific CD8 T cells from ECs**

189 Our prior work on the DNA methyltransferase, DNMT3a, has found that DNMT3a-  
190 mediated *de novo* DNA methylation reinforces the terminal exhaustion state of mouse and  
191 human T cells that have been chronically stimulated (18,30) . Comparing the EC versus ART  
192 HIV-specific CD8 T cell DMR list with that of our established DNMT3a gene signature, we found  
193 that more than 20% of the DMRs overlapped with our DNMT3a gene signature. Furthermore,  
194 when we assessed the expression of transcripts that encode DNMT3a-targeted transcription  
195 factors, we found that they were expressed at significantly higher levels in ART compared to EC  
196 HIV-specific CD8 T cells (Fig 2XX). This pattern suggests increased DNMT3a activity may be  
197 one potential mechanism by which exhaustion is reinforced in HIV-specific CD8 T cells from  
198 non-controllers.

199 Because virus-specific CD8 T cell effector/memory differentiation is regulated by the  
200 coordinated activity of several hallmark transcription factors (31), we were interested in the  
201 broad differential regulation of transcription factor target genes between EC versus ART HIV-  
202 specific CD8 T cells. ART HIV-specific CD8 T cells were enriched for the expression of STAT3  
203 targets (and had lower methylation at these target genes), and they also were enriched for the  
204 expression of targets of two type-2 cytokine signaling factors (STAT6 and GATA3), which have  
205 been shown to impair CD8 T cell division and differentiation (32) (Fig. 2a bottom). Leading edge  
206 genes from the STAT3 targets that were both more highly expressed in ART and also had an  
207 associated DMR compared to the EC samples included the exhaustion-associated factors



208 *NFATC1* and *TOX* and the type-2 immunity/NK developmental TF *NFIL3* (data not shown).  
209 Other leading-edge genes from the STAT3 target list that were more highly expressed in the  
210 ART HIV-specific CD8 T cells suggest terminally differentiated CD8 T cells (*IKZF2*), diminished  
211 proliferation and survival (*AKT2*), and DNMT3a activity (*ZBTB18*) (33). On the other hand,  
212 STAT3 target genes associated with DMRs that demonstrated a trend towards higher  
213 expression in HIV-specific CD8 T cells from ECs included a guanine nucleotide exchange factor  
214 downstream of TCR and CD28 signaling (*VAV3*), a receptor component for the cytokine IL-12  
215 (*IL12RB1*), and a stem-associated transcription factor (*BACH2*; data not shown). Lastly, from  
216 the STAT3 targets we also observed differential methylation of the B cell follicle homing  
217 molecule *CXCR5* ( $p = 0.043$ ; also a differentially expressed gene, Fig. 1c). These data show  
218 that, compared to ECs, CD8 T cells isolated from ART-suppressed individuals have differential  
219 DNA methylation at and are enriched for the expression of genes associated with type-2  
220 immune signaling, terminal differentiation, and exhaustion, suggesting additional potential  
221 mechanisms that may underlie their relatively impaired ability to signal downstream of TCR and  
222 cytokine stimulation.

223 To further resolve the mechanisms involved in preserving the functional capacity of HIV-  
224 specific CD8 T cells from ECs, we performed Hypergeometric optimization of motif enrichment  
225 (HOMER) analysis (34) to identify transcription factors (TFs) whose binding site motifs were  
226 over-represented in the DMRs between EC versus ART HIV-specific CD8 T cells. As noted  
227 above, the majority (64%) of our DMRs were located within intronic or intergenic regions.  
228 Amongst regions that were less methylated in EC (versus ART) HIV-specific CD8 T cells, we  
229 noted a striking pattern of enrichment for the binding site sequences for several stem-  
230 associated TFs (e.g., HOX9, TCF-1, OCT4-SOX2-TCF-NANOG-POU, LEF1; Fig. 3a). Among  
231 the genes associated with the 242 DMRs containing TCF-1 motifs, we identified targets that  
232 were less methylated in ECs such as the type-2 immune TF *NFIL3* (intergenic) and the JUN and  
233 FOS transcript repressor *PRDM11* (intron), and targets that were less methylated in the ART-

234 suppressed samples such as the receptor tyrosine kinase antagonist, *SPRY2* (35) (intergenic)  
235 (Fig. 3b). Interestingly, this striking difference in methylation at TCF-1 motifs between EC versus  
236 ART HIV-specific CD8 T cells was not accompanied by differences in the level of expression of  
237 the *TCF7* transcript itself; although we have observed differences at the protein level (9).

238 In contrast to the ECs, DMRs that were less methylated in ART HIV-specific CD8 T cells  
239 were enriched for the binding site sequences for several effector differentiation-associated TFs  
240 (e.g., *TBX21*, *IRF4*) as well as for *FOXO3* motifs (Fig. 3c). Of note, *FOXO3* itself was  
241 differentially methylated and was also among the leading-edge genes from the *STAT3* and  
242 *DNMT3a* target lists (Fig. 2a). Hypomethylated DMRs in ART HIV-specific CD8 T cells included  
243 markers associated with a terminal/TEM fate (*S1PR5* (36))\_or CD8 T cell exhaustion (*TOX*,  
244 *CD101* (37)). HOMER analysis of the DMRs found enrichment of TCF-1 motifs in DMRs that  
245 were relatively hypomethylated in HIV-specific CD8 T cells from ECs and enrichment of *FOXO3*  
246 motifs in DMRs that were relatively hypomethylated in ART HIV-specific CD8 T cells. In  
247 addition, *FOXO3* targets, could potentially limit cell cycling and prevent homeostatic proliferation  
248 required for survival of long-lasting memory T cells

249

### 250 **Gene expression pathways downstream of TCR and cytokine signaling are differentially** 251 **regulated in HIV-specific CD8+ T cells from ECs**

252 Given that enhanced functional capacity of HIV-specific CD8 T cells in ECs is measured  
253 by increased responses to antigen stimulation (as measured by either cytokine production  
254 and/or proliferation) (9), we hypothesized that HIV-specific CD8 T cells from ECs might be  
255 transcriptionally and/or epigenetically poised to respond to TCR signals. Indeed, leading edge  
256 genes from several of the pathways that we found are enriched in EC HIV-specific CD8 T cells  
257 included several genes that encode key proteins involved in TCR signaling (e.g., *ITK*, *LCK*,  
258 *SLP76/LCP2*) (Fig. 4c). Furthermore, HIV-specific CD8 T cells also had evidence of increased  
259 signaling downstream of *IL-12/STAT4* (Fig. 4a,c), a cytokine that is critical for promoting the

260 acquisition of antiviral properties in T cells. Leading edge genes downstream of these pathways  
261 that were enriched in the EC HIV-specific CD8 T cells (e.g., *IL12RB1*, *IL12RB2*, *TYK2*) suggest  
262 that these cells may have enhanced responsiveness to IL-12. Finally, HIV-specific CD8 T cells  
263 from ECs also had higher expression of gene targets of pathways that promote metabolic  
264 activity and cell cycling (e.g., pathways regulated by MTOR, MYC, and E2F) (data not shown).  
265 Taken together, these data show that EC CD8 T cells maintain TCR and IL-12/STAT4 signaling  
266 capacity along with enrichment of metabolic pathways important for proliferation (MYC and  
267 E2F), effector function (Fatty Acid Metabolism and MTORC1 signaling), and survival (unfolded  
268 protein response [UPR]).

269 In contrast to ECs, ART HIV-specific CD8 T cells were enriched for TNF $\alpha$  Signaling via  
270 NFkB pathway (Fig. 4a). Leading edge genes expressed at higher levels in ART CD8 T cells  
271 included the NFkB signaling inhibitors *NFkBIA* and *TNFAIP3* (a.k.a *A20*), and the pro-apoptotic  
272 molecules *KLF4* and *DRAM1*. These data suggest that HIV-specific CD8 T cells from individuals  
273 on ART may have enhanced sensitivity to the negative effects of TNF $\alpha$  including reduced  
274 signaling through NFkB and increased pro-apoptotic markers.

275 Other pathways with gene targets that were differentially methylated between EC and  
276 ART HIV-specific CD8 T cells included the IL2-STAT5 signaling, IL-4 and IL-13 signaling, and  
277 signaling by G protein-coupled receptor (GPCR) pathways (Fig. 4d). Many differentially  
278 methylated genes within these signaling pathways suggest enhanced responsiveness of EC  
279 HIV-specific CD8 T cells to TCR and cytokine signaling, including genes that encode isoforms of  
280 diacylglycerol (DAG) kinases (e.g., *DGKB*, *DGKK*, *DGKH*, *DKGZ*) and protein kinase C (e.g.,  
281 *PRKCA*, *PRKCD*, *PRKCH*), guanine nucleotide exchange factors (GEFs; e.g., *SWAP70*,  
282 *ARHGEF3*, *VAV3*), the solute transporter *SLC2A3/GLUT3*, GTPase *RHOB*, T cell differentiation  
283 TFs *IRF4* and *EOMES*, migratory molecules associated with LN egress (*S1PR5*), B cell follicle  
284 homing (*CXCR5*), recruitment to inflammatory sites (*CCR2*), and terminal differentiation  
285 (*CX3CR1*). These data demonstrate that HIV-specific CD8 T cells from ECs are transcriptionally

286 and epigenetically poised for rapid TCR and cytokine signaling pathway activation, and they  
287 have unique epigenetic programs that regulate the expression of migratory molecules  
288 associated with T cell function and developmental status.

289

## 290 **Discussion**

291 HIV-specific CD8 T cells in elite controllers can maintain suppressive antiviral activity for  
292 decades in infected individuals (38). Although many HIV cure strategies seek to elicit T cells that  
293 possess the functional capacity of HIV-specific CD8 T cells from ECs, the cell-intrinsic  
294 mechanisms responsible for their ability to sustain long term effector and proliferative potential  
295 are not well understood. By analyzing the transcriptome and methylome datasets from antigen-  
296 specificity matched CD8 T cells isolated from ECs and aviremic ART-suppressed non-  
297 controllers, our work here identified differentially regulated gene expression and epigenetic  
298 pathways involved in memory differentiation and exhaustion, proliferation and survival, and TCR  
299 and cytokine signaling that delineate a virus specific T cell response among EC versus aviremic  
300 ART treated non-controllers.

301 Consistent with the known antiviral capacity and enhanced antigen responsiveness of  
302 HIV-specific CD8 T cells in ECs (5,7,9,39,40), our analysis identified several genes significantly  
303 upregulated in EC CD8 T cells involved in T cell survival (*IL2RA*), homing potential to the major  
304 HIV reservoirs (*CXCR5*), and effector function (*IFNG*). These data suggest that retained  
305 function of CD8 T cells in ECs allow for surveillance and control during viral latency and  
306 potential reactivation (41,42). In line with the idea of sustained viral control, our key findings  
307 from the epigenetic analysis included DMRs in the exhaustion-associated loci of *PDCD1* and  
308 *TOX* that may act as a potential mechanisms to explain how EC HIV specific CD8 T cells  
309 remain poised for TCR stimulation despite their long-term chronic infection setting.

310 From our combined expression and epigenetic pathway analysis, we observed that EC  
311 CD8 T cells were enriched for the expression of genes associated with less exhausted/more

312 multipotent T cell differentiation states (e.g., TSCM, TCM, Tpex) as well as a signature for long-  
313 lived effector cells (21) relative to their ART counterparts. Related to sustained long term  
314 effector function, our work found expression and DNA methylation pathways that highlighted IL-  
315 12 signaling in EC HIV-specific CD8 T cells. Studies have reported the potential of IL-12 to  
316 enhance the function of exhausted T cell in tumor and viral infection (43,44) including better  
317 tumor control and lower expression of PD-1 (44). This potentially hints at an IL-12 dependent  
318 mechanism in EC HIV specific CD8 T cells that is necessary to maintain long term effector CD8  
319 T cell antiviral responses while simultaneously retaining stem-like properties.

320         Previously we showed that the stem-associated TF TCF-1 contributes to viral control  
321 differences between EC and ART CD8 T cells (9). Although we did not observe stem-associated  
322 TF expression differences between EC and ART HIV specific CD8 T cells in this study, our  
323 analysis found differential epigenetic regulation of TCF-1 and LEF1 DNA binding sites that may  
324 be responsible for sustained viral control. Our work also found differential regulation of  
325 transcription factors targeted by DNMT3a which we have previously found to be responsible for  
326 *de novo* DNA methylation mediated exhaustion programs in LCMV chronic mouse model of  
327 infection (18). The enrichment of TCF-1 binding site motifs at EC hypomethylated regions  
328 suggests an EC HIV specific CD8 T cell intrinsic mechanism that is resistant to DNA methylation  
329 at specific sites that enables continued binding of TCF-1. These data suggest that both DNA  
330 methylation and demethylation programs may play a role in the establishment of or resistance to  
331 DNA methylation-associated exhaustion programs.

332         In summary, here we have provided a co-omics approach to identify differentially  
333 regulated transcriptional programs between HIV-specific CD8 T cells in ECs versus ART-  
334 suppressed individuals. Our expression and methylome pathway analysis determined that EC  
335 HIV-specific CD8 T cells maintained a more stem-like profile compared to those from ART. We  
336 found TCR and cytokine intracellular signaling pathways that remained poised in EC HIV  
337 specific CD8 T cells, specifically related to the IL-12 family signaling pathway. In addition, while

338 we didn't observe direct mRNA expression differences in the stem-associated TFs *TCF7* and  
339 *LEF1*, we did find differentially epigenetic regulation of their DNA binding motifs. Future work will  
340 focus on whether these findings extend to other HIV-specific epitopes and chronic infection  
341 settings. It also remains to be tested as to what DMRs are necessary to phenocopy the  
342 sustained antiviral response of the EC HIV specific CD8 T cells. A recent study has shown that  
343 it is possible to leverage CRISPR technology to target precise regions for DNA methylation (45)  
344 to test potential DMR targets from this study to attempt to copy the EC HIV specific CD8 T cell  
345 phenotype. The importance in the characterization of peripheral HIV specific CD8 T cells lies in  
346 their immunotherapeutic potential in light of recent findings showing that future immunotherapies  
347 may be dependent on recruitable cells considering that tissue resident cells can be refractory to  
348 immune checkpoint blockade (46,47).

349

## 350 **Methods**

351 **Human study participants and samples:** This study sampled de-identified PBMCs  
352 retrospectively collected under IRB approval from participants with HIV enrolled in the  
353 Zuckerberg San Francisco General Hospital clinic-based SCOPE cohort.

354

## 355 **Human PBMC sorting by flow cytometry:**

356 Cryopreserved PBMCs were thawed as described previously and enriched for CD8 T cells by  
357 negative selection with magnetic beads (STEMCELL). HIV-specific CD8+ T cells were identified  
358 via staining with peptide–MHC Class I multimers, either monomers that were provided by RPS  
359 (Emory University, Atlanta, Georgia, USA) and tetramerized as described using PE, or  
360 biotinylated pentamers (ProImmune) followed by staining with streptavidin PE. The multimers  
361 used in this study targeted the following specificities: HLA-A\*02 (SL9), HLA-B\*27 (KK10), HLA-  
362 B\*07 (TL10). PBMCs were incubated with multimer diluted in PBS for 15 minutes at room  
363 temperature (pentamer) or 20 minutes at 37°C (tetramer), followed by 20 minutes at room

364 temperature with surface antibodies (with streptavidin for stains with pentamer), along with a  
365 viability dye to allow for discrimination of dead cells (Thermo Fisher Scientific). Live multimer+  
366 and non-multimer bulk CD8 T cell populations were sorted using a BD FACS-Aria II.

367

368 **Genomic methylation analysis:** DNA was extracted from the sorted cells using a DNA  
369 extraction kit (QIAGEN) and then bisulfite-treated using an EZ DNA methylation kit (Zymo  
370 Research), which converts all unmethylated cytosines to uracils. WGBS was performed as  
371 described previously. Briefly, bisulfite-modified DNA sequencing libraries were generated using  
372 the EpiGenome kit (Epicentre) according to the manufacturer's instructions. Bisulfite-modified  
373 DNA libraries were sequenced using Illumina HiSeq 4000 and NovaSeq 6000 systems.  
374 Sequencing data were aligned to the Hg19 genome using the BSMAP v. 2.74 software. Using  
375 significantly methylated CpG sites ( $p < 0.01$ ), DMRs were defined as  $\geq 3$  CpG sites within a  
376 minimum base pair length of 100, and each site associated with a single gene and a pairwise  
377 comparison done between EC and ART CD8 T cells.

378

### 379 **Hypergeometric optimization of motif enrichment (HOMER)**

380 A 20% minimum difference in methylation was applied to the EC vs ART HIV-tetramer+ CD8 T  
381 cell DMR list and split into DMRs that were relatively hypomethylated in ART or EC CD8 T cells.  
382 These DMRs were then analyzed for transcription factor motifs using HOMER. Motifs with an  
383 FDR of  $< 0.01$  were assessed.

384

385 **DECLARATION OF INTEREST:** Drs. Youngblood and Zebley have patents related  
386 to epigenetic biomarkers and methods for enhancing T cell function for cellular therapies.

387

### 388 **Acknowledgments**

389 The content is solely the responsibility of the authors and does not necessarily represent the  
390 official views of the NIH. This work was supported by the National Institutes of Health,  
391 K23AI134327 (RLR), R01AI114442 and R01CA237311 (BY), loan repayment program and the  
392 National Comprehensive Cancer Network Young Investigator Award (CZ), ASSISI foundation  
393 support to BY, and the American Lebanese Syrian Associated Charities (ALSAC to BY).  
394 Additional support for SCOPE was provided by the amfAR Institute for HIV Cure Research (SD  
395 and RR).

396

### 397 **Figure Legends**

398 **Figure 1. Transcriptional and DNA methylation programs delineate ART versus EC HIV-**  
399 **specific CD8 T cells**

400 A. Principal component analysis (PCA) of RNAseq profiles of sorted HIV-specific multimer+ CD8  
401 T cells from elite controllers (EC) versus ART-suppressed non-controllers (ART) and bulk TN,  
402 TCM, and TEM CD8 T cells from the same donors.

403 B. Volcano plot of differentially expressed genes between EC (n = 4) and ART (n = 4) HIV-  
404 specific CD8 T cells (p<0.05)

405 C. Representative transcripts enriched in EC (top) and ART (bottom) HIV-specific CD8 T cells

406 D. PCA of DNA methylation profiles of sorted HIV-specific multimer+ CD8 T cells (EC versus  
407 ART) and bulk TN, TSCM, TCM, and TEM CD8 T cells from HIV-uninfected donors.

408 E. Genes associated with differentially methylated regions (DMR)s between ART (green) and  
409 EC (yellow) HIV-specific CD8 T cells (methylation difference between the two conditions versus  
410 area-statistic). DMRs below the 20% threshold are in black.

411 F. DNA methylation patterns at intron 1 of the *PDCD1* locus in HIV-specific CD8 T cells from EC  
412 (yellow) versus ART (green) donors (top) and percent DNA methylation in this region in bulk  
413 CD8 T cell subsets compared to EC or ART HIV-specific CD8 T cells (bottom). P-value  
414 calculated using average methylation from significant DMR CpG sites.



415

416 **Figure 2. Pathways that govern CD8+ T cell memory and exhaustion are differentially**  
417 **regulated in HIV-specific CD8+ T cells from elite controllers versus ART-suppressed non-**  
418 **controllers**

419 A. Heatmap of pathways that are differentially expressed and methylated between EC and ART  
420 HIV specific CD8 T cells (Nominal p value < 0.01).

421 B. Heatmap of leading edge genes from pathways differentially expressed and methylated.

422 C. Heatmap of DMRs from pathways differentially expressed and methylated

423

424 **Figure 3. Differential methylated regions at stem-associated transcription factor binding**  
425 **sites delineate ART vs EC HIV specific CD8 T cells**

426 A. HOMER analysis of relatively hypomethylated EC HIV specific CD8 T cell DMRs (FDR <  
427 0.01)

428 B. Heatmap of DMR genes containing Tcf7 motifs

429 C. HOMER analysis of hypomethylated ART HIV specific CD8 T cell DMRs (FDR < 0.01)

430 D. Heatmap of DMR genes containing Foxo3 motifs

431

432 **Figure 4. Elite controller HIV-specific CD8+ T cells differentially regulate pathways**  
433 **sensitivity to TCR and cytokine signaling and metabolism.**

434 A. Heatmaps of differentially expressed pathways between EC and ART HIV-tetramer+ CD8 T  
435 cells (Nominal p value < 0.01).

436 B. Heatmaps of differentially methylated pathways between EC and ART HIV-tetramer+ CD8 T  
437 cells.

438 C. Heatmaps of pathway leading edge genes expressed between EC and ART HIV-tetramer+  
439 CD8 T cells.

440 D. Heatmaps of pathway targets differentially methylated between EC and ART HIV-tetramer+  
441 CD8 T cells.

442

443

444

445

## 446 **References**

- 447 1. Fellay, J., K.V. Shianna, D. Ge, et al. A whole-genome association study of major  
448 determinants for host control of HIV-1. *Science*, 2007. **317**(5840): p. 944-7.
- 449 2. Fellay, J., D. Ge, K.V. Shianna, et al. Common Genetic Variation and the Control of  
450 HIV-1 in Humans. *PLOS Genetics*, 2009. **5**(12): p. e1000791.
- 451 3. Cartwright, E.K., L. Spicer, S.A. Smith, et al. CD8(+) Lymphocytes Are Required for  
452 Maintaining Viral Suppression in SIV-Infected Macaques Treated with Short-Term  
453 Antiretroviral Therapy. *Immunity*, 2016. **45**(3): p. 656-668.
- 454 4. Migueles, S.A., A.C. Laborico, W.L. Shupert, et al. HIV-specific CD8+ T cell  
455 proliferation is coupled to perforin expression and is maintained in nonprogressors. *Nat*  
456 *Immunol*, 2002. **3**(11): p. 1061-8.
- 457 5. Migueles, S.A., C.M. Osborne, C. Royce, et al. Lytic Granule Loading of CD8+ T Cells  
458 Is Required for HIV-Infected Cell Elimination Associated with Immune Control.  
459 *Immunity*, 2008. **29**(6): p. 1009-1021.
- 460 6. Betts, M.R., M.C. Nason, S.M. West, et al. HIV nonprogressors preferentially maintain  
461 highly functional HIV-specific CD8+ T cells. *Blood*, 2006. **107**(12): p. 4781-9.
- 462 7. Hersperger, A.R., F. Pereyra, M. Nason, et al. Perforin Expression Directly Ex Vivo by  
463 HIV-Specific CD8+ T-Cells Is a Correlate of HIV Elite Control. *PLOS Pathogens*, 2010.  
464 **6**(5): p. e1000917.
- 465 8. Migueles, S.A., K.A. Weeks, E. Nou, et al. Defective human immunodeficiency virus-  
466 specific CD8+ T-cell polyfunctionality, proliferation, and cytotoxicity are not restored by  
467 antiretroviral therapy. *J Virol*, 2009. **83**(22): p. 11876-89.
- 468 9. Rutishauser, R.L., C.D.T. Deguit, J. Hiatt, et al. TCF-1 regulates HIV-specific CD8+ T  
469 cell expansion capacity. *JCI Insight*, 2021. **6**(3).
- 470 10. Yates, K.B., P. Tonnerre, G.E. Martin, et al. Epigenetic scars of CD8(+) T cell exhaustion  
471 persist after cure of chronic infection in humans. *Nat Immunol*, 2021. **22**(8): p. 1020-  
472 1029.
- 473 11. Hensel, N., Z. Gu, Sagar, et al. Memory-like HCV-specific CD8(+) T cells retain a  
474 molecular scar after cure of chronic HCV infection. *Nat Immunol*, 2021. **22**(2): p. 229-  
475 239.
- 476 12. Tonnerre, P., D. Wolski, S. Subudhi, et al. Differentiation of exhausted CD8+ T cells  
477 after termination of chronic antigen stimulation stops short of achieving functional T cell  
478 memory. *Nature Immunology*, 2021. **22**(8): p. 1030-1041.

- 479 13. Abdel-Hakeem, M.S., S. Manne, J.C. Beltra, et al. Epigenetic scarring of exhausted T  
480 cells hinders memory differentiation upon eliminating chronic antigenic stimulation. *Nat*  
481 *Immunol*, 2021. **22**(8): p. 1008-1019.
- 482 14. Ahn, E., B. Youngblood, J. Lee, et al. Demethylation of the PD-1 Promoter Is Imprinted  
483 during the Effector Phase of CD8 T Cell Exhaustion. *J Virol*, 2016. **90**(19): p. 8934-46.
- 484 15. Blank, C.U., W.N. Haining, W. Held, et al. Defining 'T cell exhaustion'. *Nature Reviews*  
485 *Immunology*, 2019. **19**(11): p. 665-674.
- 486 16. Franco, F., A. Jaccard, P. Romero, et al. Metabolic and epigenetic regulation of T-cell  
487 exhaustion. *Nat Metab*, 2020. **2**(10): p. 1001-1012.
- 488 17. Khan, O., J.R. Giles, S. McDonald, et al. TOX transcriptionally and epigenetically  
489 programs CD8+ T cell exhaustion. *Nature*, 2019. **571**(7764): p. 211-218.
- 490 18. Ghoneim, H.E., Y. Fan, A. Moustaki, et al. De Novo Epigenetic Programs Inhibit PD-1  
491 Blockade-Mediated T Cell Rejuvenation. *Cell*, 2017. **170**(1): p. 142-157.e19.
- 492 19. Pombo, C., E.J. Wherry, E. Gostick, et al. Elevated Expression of CD160 and 2B4  
493 Defines a Cytolytic HIV-Specific CD8+ T-Cell Population in Elite Controllers. *J Infect*  
494 *Dis*, 2015. **212**(9): p. 1376-86.
- 495 20. Sekine, T., A. Perez-Potti, S. Nguyen, et al. TOX is expressed by exhausted and  
496 polyfunctional human effector memory CD8+ T cells. *Science Immunology*, 2020. **5**(49):  
497 p. eaba7918.
- 498 21. Renkema, K.R., M.A. Huggins, H. Borges da Silva, et al. KLRG1+ Memory CD8 T Cells  
499 Combine Properties of Short-Lived Effectors and Long-Lived Memory. *The Journal of*  
500 *Immunology*, 2020: p. ji1901512.
- 501 22. Beltra, J.-C., S. Manne, M.S. Abdel-Hakeem, et al. Developmental Relationships of Four  
502 Exhausted CD8+ T Cell Subsets Reveals Underlying Transcriptional and Epigenetic  
503 Landscape Control Mechanisms. *Immunity*, 2020. **52**(5): p. 825-841.e8.
- 504 23. Kim, E.Y., S.J. Teh, J. Yang, et al. TNFR2-deficient memory CD8 T cells provide  
505 superior protection against tumor cell growth. *J Immunol*, 2009. **183**(10): p. 6051-7.
- 506 24. Harari, A., F. Bellutti Enders, C. Cellera, et al. Distinct profiles of cytotoxic granules in  
507 memory CD8 T cells correlate with function, differentiation stage, and antigen exposure.  
508 *J Virol*, 2009. **83**(7): p. 2862-71.
- 509 25. Naluyima, P., K.G. Lal, M.C. Costanzo, et al. Terminal Effector CD8 T Cells Defined by  
510 an IKZF2+IL-7R- Transcriptional Signature Express FcγRIIIA, Expand in HIV Infection,  
511 and Mediate Potent HIV-Specific Antibody-Dependent Cellular Cytotoxicity. *The*  
512 *Journal of Immunology*, 2019. **203**(8): p. 2210.
- 513 26. Dominguez, C.X., R.A. Amezcua, T. Guan, et al. The transcription factors ZEB2 and T-  
514 bet cooperate to program cytotoxic T cell terminal differentiation in response to LCMV  
515 viral infection. *J Exp Med*, 2015. **212**(12): p. 2041-56.
- 516 27. Wang, R., C.P. Dillon, L.Z. Shi, et al. The transcription factor Myc controls metabolic  
517 reprogramming upon T lymphocyte activation. *Immunity*, 2011. **35**(6): p. 871-82.
- 518 28. Leong, Y.A., Y. Chen, H.S. Ong, et al. CXCR5+ follicular cytotoxic T cells control viral  
519 infection in B cell follicles. *Nature Immunology*, 2016. **17**(10): p. 1187-1196.
- 520 29. Zander, R., D. Schauder, G. Xin, et al. CD4(+) T Cell Help Is Required for the Formation  
521 of a Cytolytic CD8(+) T Cell Subset that Protects against Chronic Infection and Cancer.  
522 *Immunity*, 2019. **51**(6): p. 1028-1042.e4.

- 523 30. Abdelsamed, H.A., A. Moustaki, Y. Fan, et al. Human memory CD8 T cell effector  
524 potential is epigenetically preserved during in vivo homeostasis. *Journal of Experimental*  
525 *Medicine*, 2017. **214**(6): p. 1593-1606.
- 526 31. Tsuda, S. and M.E. Pipkin. Transcriptional Control of Cell Fate Determination in  
527 Antigen-Experienced CD8 T Cells. *Cold Spring Harbor Perspectives in Biology*, 2021.
- 528 32. Fox, A., K.L. Harland, K. Kedzierska, et al. Exposure of Human CD8+ T Cells to Type-2  
529 Cytokines Impairs Division and Differentiation and Induces Limited Polarization.  
530 *Frontiers in Immunology*, 2018. **9**(1141).
- 531 33. Fuks, F., W.A. Burgers, N. Godin, et al. Dnmt3a binds deacetylases and is recruited by a  
532 sequence-specific repressor to silence transcription. *Embo j*, 2001. **20**(10): p. 2536-44.
- 533 34. Heinz, S., C. Benner, N. Spann, et al. Simple combinations of lineage-determining  
534 transcription factors prime cis-regulatory elements required for macrophage and B cell  
535 identities. *Mol Cell*, 2010. **38**(4): p. 576-89.
- 536 35. Shehata, H.M., S. Khan, E. Chen, et al. Lack of Sprouty 1 and 2 enhances survival of  
537 effector CD8+ T cells and yields more protective memory cells. *Proceedings of the*  
538 *National Academy of Sciences*, 2018. **115**(38): p. E8939-E8947.
- 539 36. Milner, J.J., H. Nguyen, K. Omilusik, et al. Delineation of a molecularly distinct  
540 terminally differentiated memory CD8 T cell population. *Proceedings of the National*  
541 *Academy of Sciences*, 2020: p. 202008571.
- 542 37. Hudson, W.H., J. Gensheimer, M. Hashimoto, et al. Proliferating Transitory T Cells with  
543 an Effector-like Transcriptional Signature Emerge from PD-1(+) Stem-like CD8(+) T  
544 Cells during Chronic Infection. *Immunity*, 2019. **51**(6): p. 1043-1058.e4.
- 545 38. Deeks, S.G. and B.D. Walker. Human immunodeficiency virus controllers: mechanisms  
546 of durable virus control in the absence of antiretroviral therapy. *Immunity*, 2007. **27**(3): p.  
547 406-16.
- 548 39. O'Connell, K.A., T.P. Brennan, J.R. Bailey, et al. Control of HIV-1 in elite suppressors  
549 despite ongoing replication and evolution in plasma virus. *J Virol*, 2010. **84**(14): p. 7018-  
550 28.
- 551 40. Ferre, A.L., D. Lemongello, P.W. Hunt, et al. Immunodominant HIV-Specific CD8+ T-  
552 Cell Responses Are Common to Blood and Gastrointestinal Mucosa, and Gag-Specific  
553 Responses Dominate in Rectal Mucosa of HIV Controllers. *Journal of Virology*, 2010.  
554 **84**(19): p. 10354-10365.
- 555 41. Quigley, M.F., V.D. Gonzalez, A. Granath, et al. CXCR5+ CCR7- CD8 T cells are early  
556 effector memory cells that infiltrate tonsil B cell follicles. *Eur J Immunol*, 2007. **37**(12):  
557 p. 3352-62.
- 558 42. Petrovas, C., S. Ferrando-Martinez, M.Y. Gerner, et al. Follicular CD8 T cells  
559 accumulate in HIV infection and can kill infected cells in vitro via bispecific antibodies.  
560 *Science translational medicine*, 2017. **9**(373): p. eaag2285.
- 561 43. Schurich, A., L.J. Pallett, M. Lubowiecki, et al. The Third Signal Cytokine IL-12 Rescues  
562 the Anti-Viral Function of Exhausted HBV-Specific CD8 T Cells. *PLOS Pathogens*,  
563 2013. **9**(3): p. e1003208.
- 564 44. Gerner, M.Y., L.M. Heltemes-Harris, B.T. Fife, et al. Cutting edge: IL-12 and type I IFN  
565 differentially program CD8 T cells for programmed death 1 re-expression levels and  
566 tumor control. *J Immunol*, 2013. **191**(3): p. 1011-5.
- 567 45. Nuñez, J.K., J. Chen, G.C. Pommier, et al. Genome-wide programmable transcriptional  
568 memory by CRISPR-based epigenome editing. *Cell*, 2021. **184**(9): p. 2503-2519.e17.

- 569 46. Yost, K.E., A.T. Satpathy, D.K. Wells, et al. Clonal replacement of tumor-specific T cells  
570 following PD-1 blockade. *Nature Medicine*, 2019. **25**(8): p. 1251-1259.
- 571 47. Zebley, C.C., S. Gottschalk, and B. Youngblood. Rewriting History: Epigenetic  
572 Reprogramming of CD8+ T Cell Differentiation to Enhance Immunotherapy. *Trends in*  
573 *Immunology*, 2020. **41**(8): p. 665-675.  
574

Figure 1. Transcriptional and DNA Methylation programs delineate ART versus EC HIV specific CD8 T cells

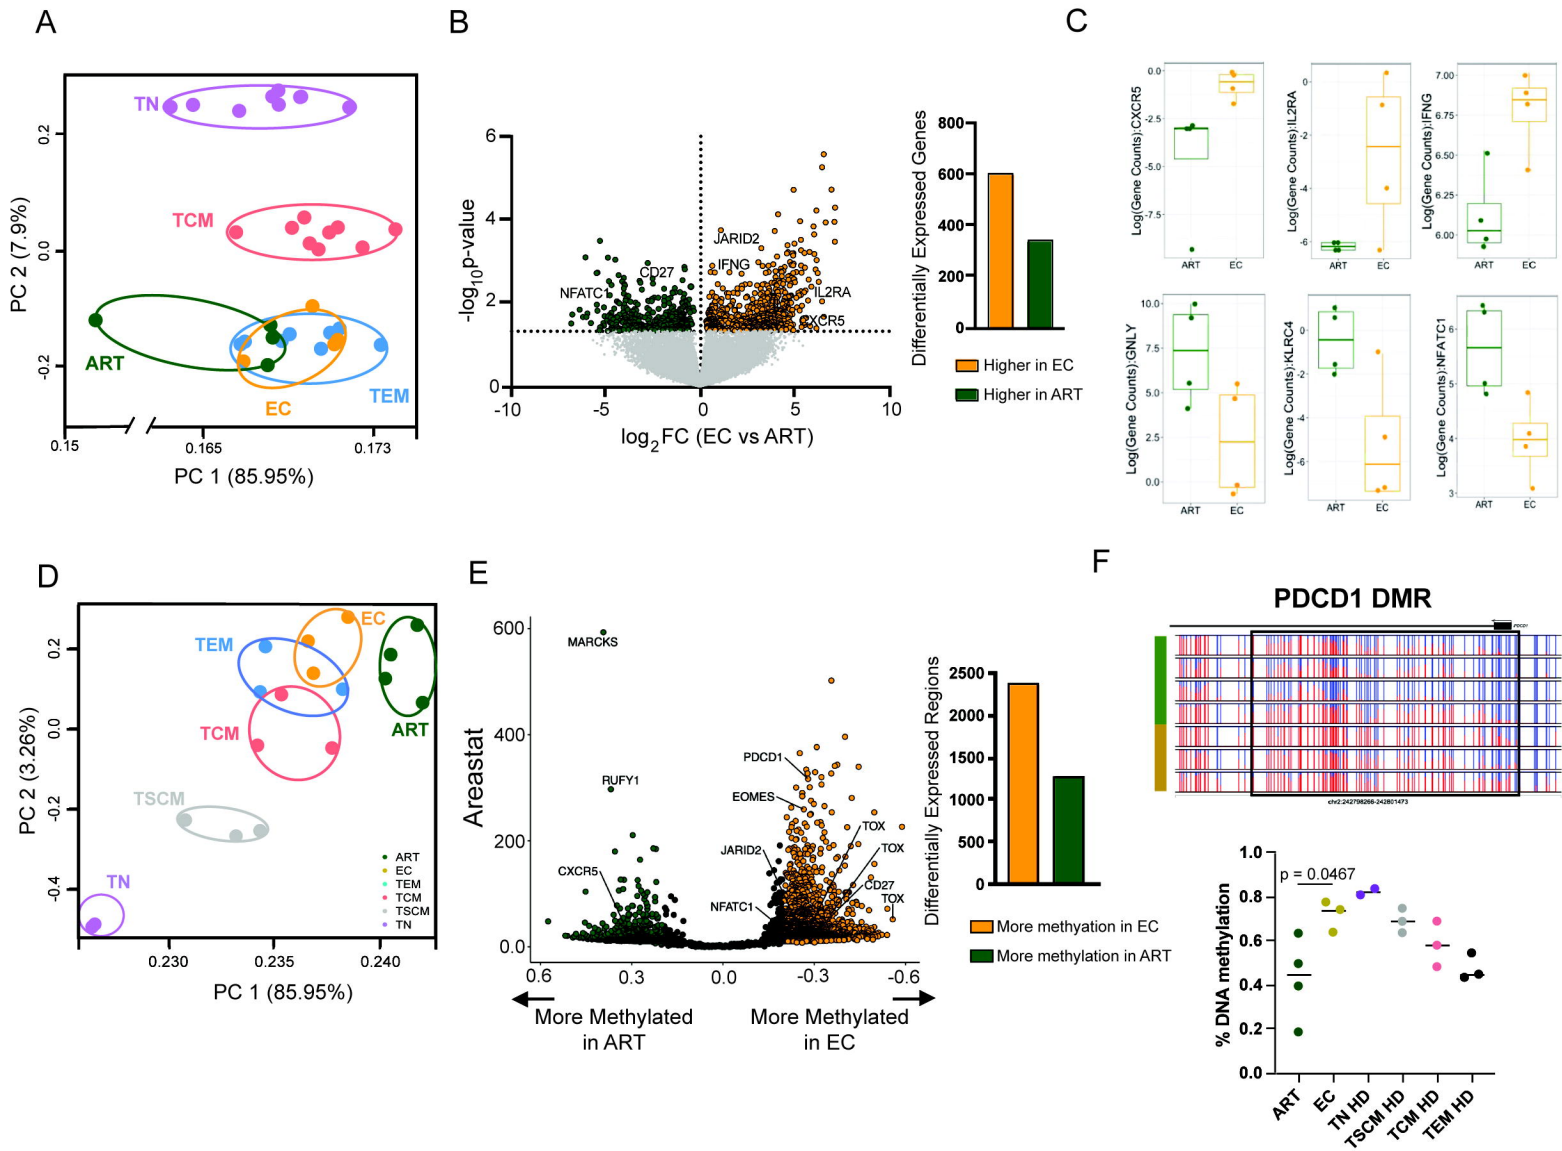

Figure 2. Pathways that govern CD8+ T cell memory and exhaustion are differentially regulated in HIV-specific CD8+ T cells from elite controllers versus ART-suppressed non-controllers.

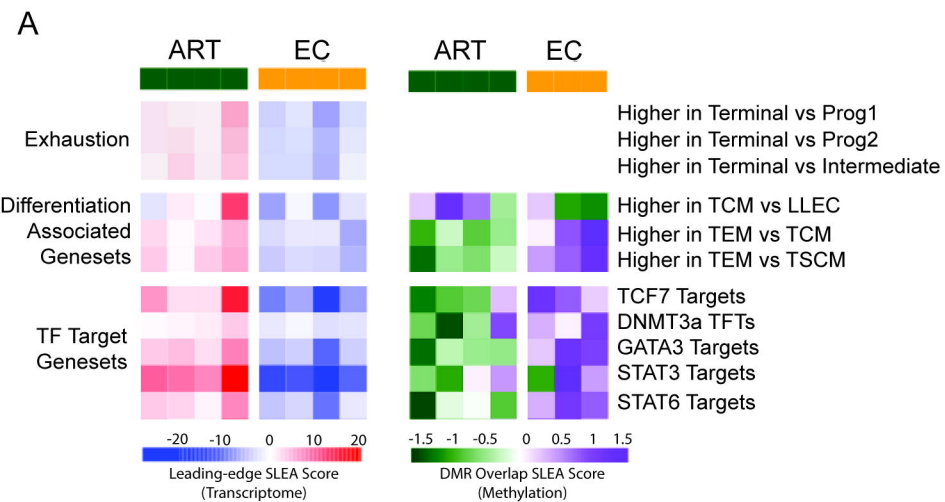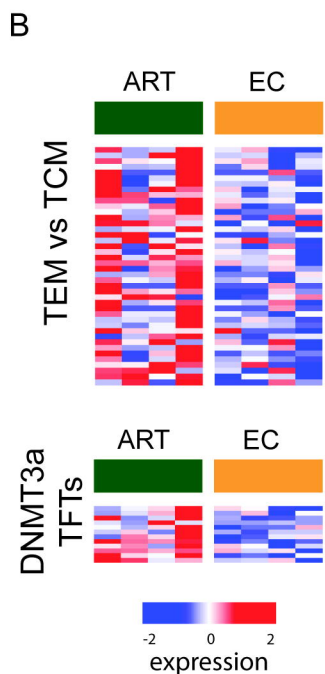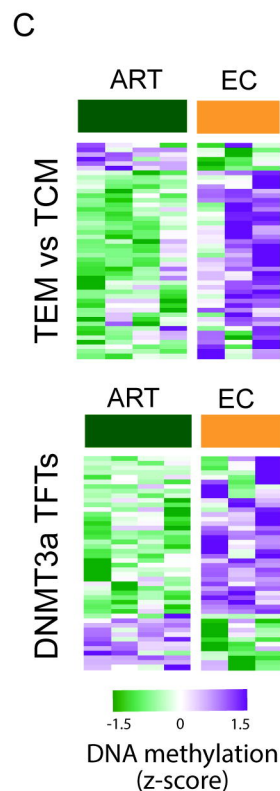

Figure 3. Differentially methylated regions at stem-associated transcription factor binding sites delineate ART vs EC HIV specific CD8 T cells

A

TF motif enrichment  
EC hypomethylated DMRs

| EC hypomethylated DMRs |           |
|------------------------|-----------|
|                        | Hoxc9     |
|                        | Tcf7/TCF7 |
|                        | OCT4-SOX4 |
|                        | Brn1      |
|                        | EWS:ERG   |
|                        | LEF1      |

C

TF motif enrichment  
ART hypomethylated DMRs

| ART hypomethylated DMRs |             |
|-------------------------|-------------|
|                         | Runx1       |
|                         | GATA3       |
|                         | Tbx21-TBX21 |
|                         | IRF4        |
|                         | Foxo3       |

B

DMRs with Tcf7/TCF7 Motifs

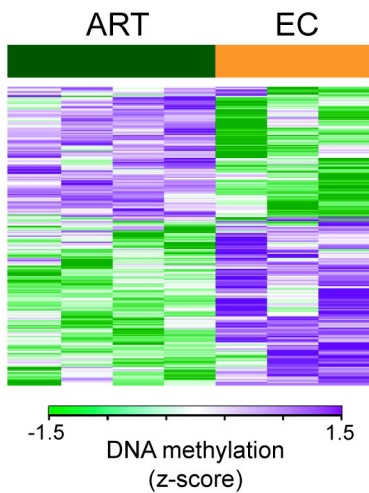

D

DMRs with Foxo3 motifs

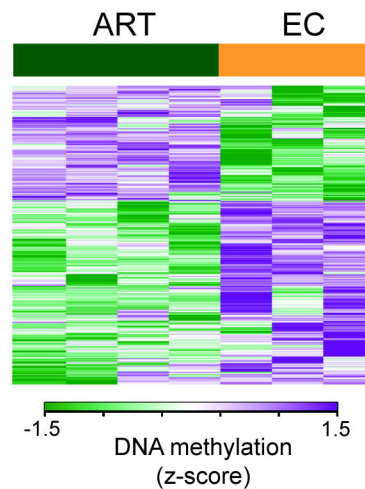

DMRs with LEF1 Motifs

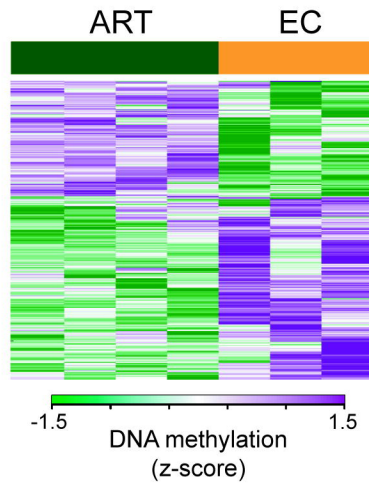



Figure 4. Elite controller HIV-specific CD8 T cells differentially regulate pathways sensitive to TCR, cytokine signaling, and metabolism

A

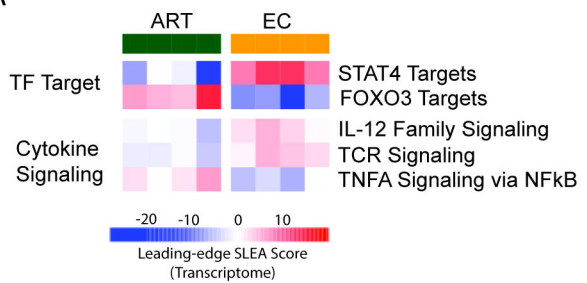

B

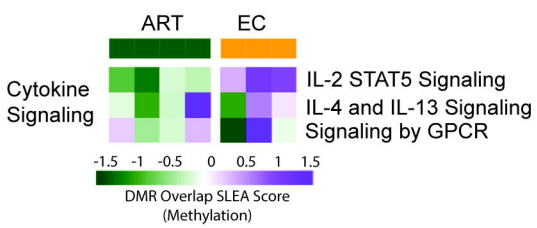

C

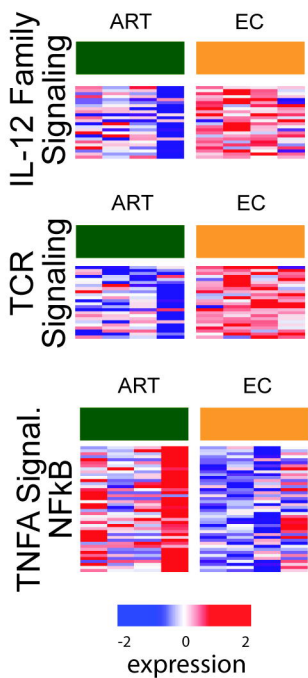

D

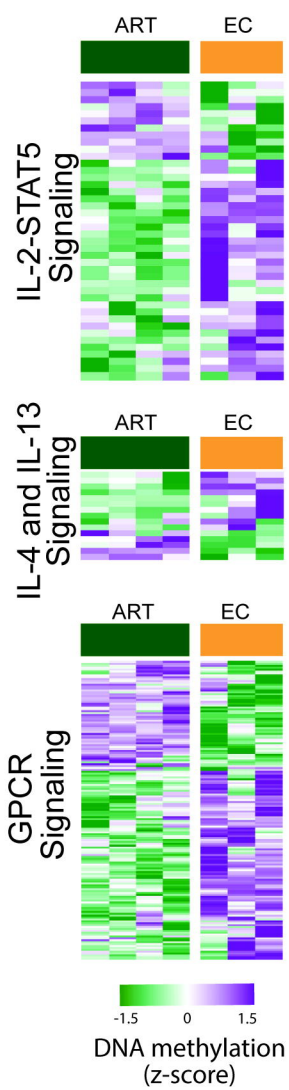

Source: https://www.biorxiv.org/content/10.1101/2021.09.28.459512v1.full.pdf
